# Supplementary material
Source: PubMed Central journal article supplement (PMC3863689)
Supplement: NIHMS455190-supplement-supplemental_information.pdf [file NIHMS455190-supplement-supplemental_information.pdf]

**Simultaneous Detection of Cell-Secreted TNF- $\alpha$  and IFN- $\gamma$  Using Micropatterned  
Aptamer-Modified Electrodes**

Ying Liu, Timothy Kwa, Alexander Revzin\*

Department of Biomedical Engineering, University of California, Davis

\*Corresponding author: Alexander Revzin Ph.D.

Department of Biomedical Engineering, University of California Davis

451 Health Sciences Drive #2519

Davis, CA, 95616

Ph: 530-752-2383

[arevzin@ucdavis.edu](mailto:arevzin@ucdavis.edu)

**Supporting Information – Table of Contents**

- Part 1: Layout of the experimental setup (Figure S1)**
- Part 2: Continuous monitoring of IFN- $\gamma$ /TNF- $\alpha$  release using dual cytokine binding aptamers modified electrodes from captured Molt-3 cells. (Figure S2)**
- Part 3: Transport Considerations and the Determination of IFN- $\gamma$  and TNF- $\alpha$  Production Rates for activated T cells and monocytes (Figure S3)**

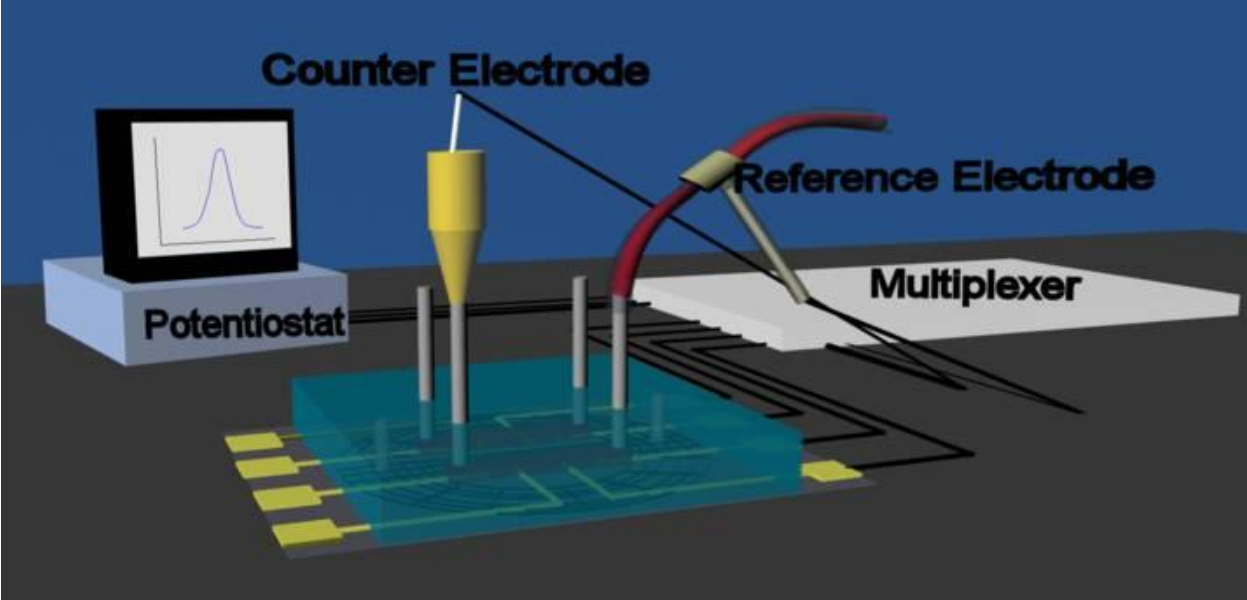

**Figure S1: Layout of the experimental setup**

## IFN- $\gamma$ /TNF- $\alpha$ Release from Molt-3 cells

### IFN- $\gamma$ secretion profile

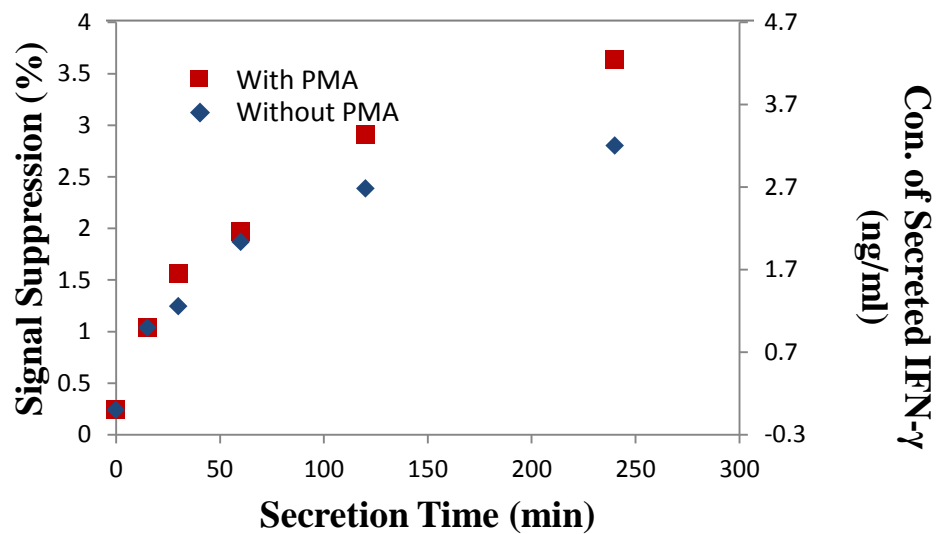

### TNF- $\alpha$ secretion profile

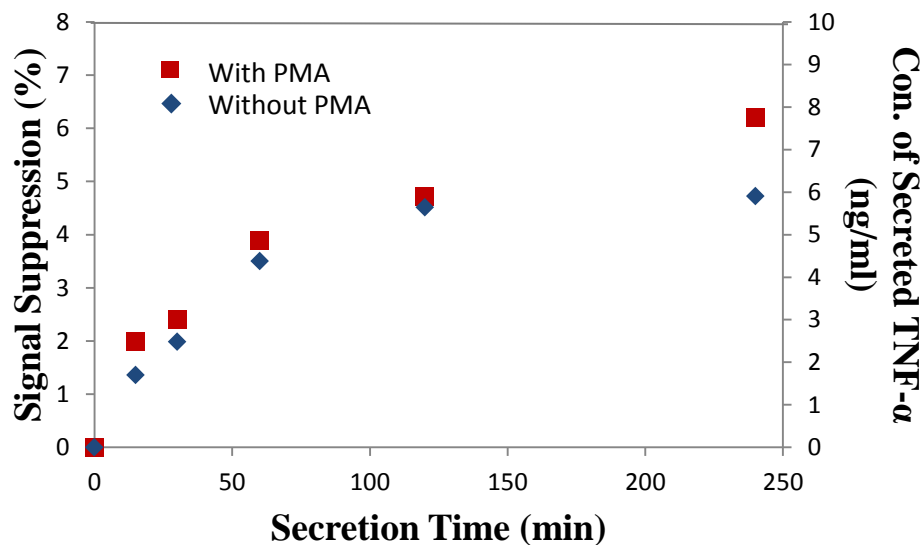

**Figure S2** Continuous monitoring of IFN- $\gamma$ /TNF- $\alpha$  release using dual cytokine binding aptamers modified electrodes from captured Molt-3 cells.

## **Part 4: Transport Considerations and the Determination of IFN- $\gamma$ / TNF- $\alpha$ Production Rates**

### *Model Setup*

Per cell IFN- $\gamma$  and TNF- $\alpha$  production rates were calculated using COMSOL Multiphysics (COMSOL, Inc., Burlington, MA). A three-dimensional model was constructed based on a 3 x 10 x 0.1 mm microfluidic chamber. Four 7  $\mu$ m deep (depth estimated from SEM images) recessed wells were placed in the bottom of this chamber with a 300 $\mu$ m inner diameter/400 $\mu$ m outer diameter ring electrode in the center of each well. The size of these well correspond to the PEG-based microwells used in our experiments (300  $\mu$ m diameter). The area of the well surrounding the electrode was set to have an inward flux corresponding to the production of IFN- $\gamma$  or TNF- $\alpha$  by cells captured in that area. The diffusivity of IFN- $\gamma$  was estimated to be  $1.45 \times 10^{-6}$  and the diffusivity of TNF- $\alpha$  was estimated to be  $9.9595 \times 10^{-7}$  using methods published by Young et al. [ Young, M. E., Carroad, P. A. and Bell, R. L. (1980), Estimation of diffusion coefficients of proteins. *Biotechnology and Bioengineering*, 22: 947–955].

### *Per Cell Production Rate Determination*

In order to determine the per cell production rate, we iteratively simulated expected transient concentration profiles for a collection of IFN- $\gamma$  and TNF- $\alpha$  production rates sequentially. Production of cytokines was assumed to begin at  $t = 0$  and remain at a constant rate throughout the experiment. Time steps were taken freely as determined by the numerical solver and data was output at 15 minute time points up to 3 hours. The average profile of measured IFN- $\gamma$  and TNF- $\alpha$  concentrations at each electrode were then fit against the predicted values from the numerical simulation. Data from the first 60 minutes of production was fit and a scaled least squares regression was used to determine the best fit production rate to 0.0001 pg/cell/hr precision.

### *Cell Production Rates at Short and Long Times*

At time points earlier than 60 minutes, the fit begins to overestimate the amount of IFN- $\gamma$  and TNF- $\alpha$  observed in our system. The over-estimation is due to the assumption of a constant rate of production over time. We expect that the cellular response to stimulation takes time to be fully realized as the cell produces cytokines for secretion. At longer time points, this rate then tapers off over time leading the reduction in observed cytokine production.

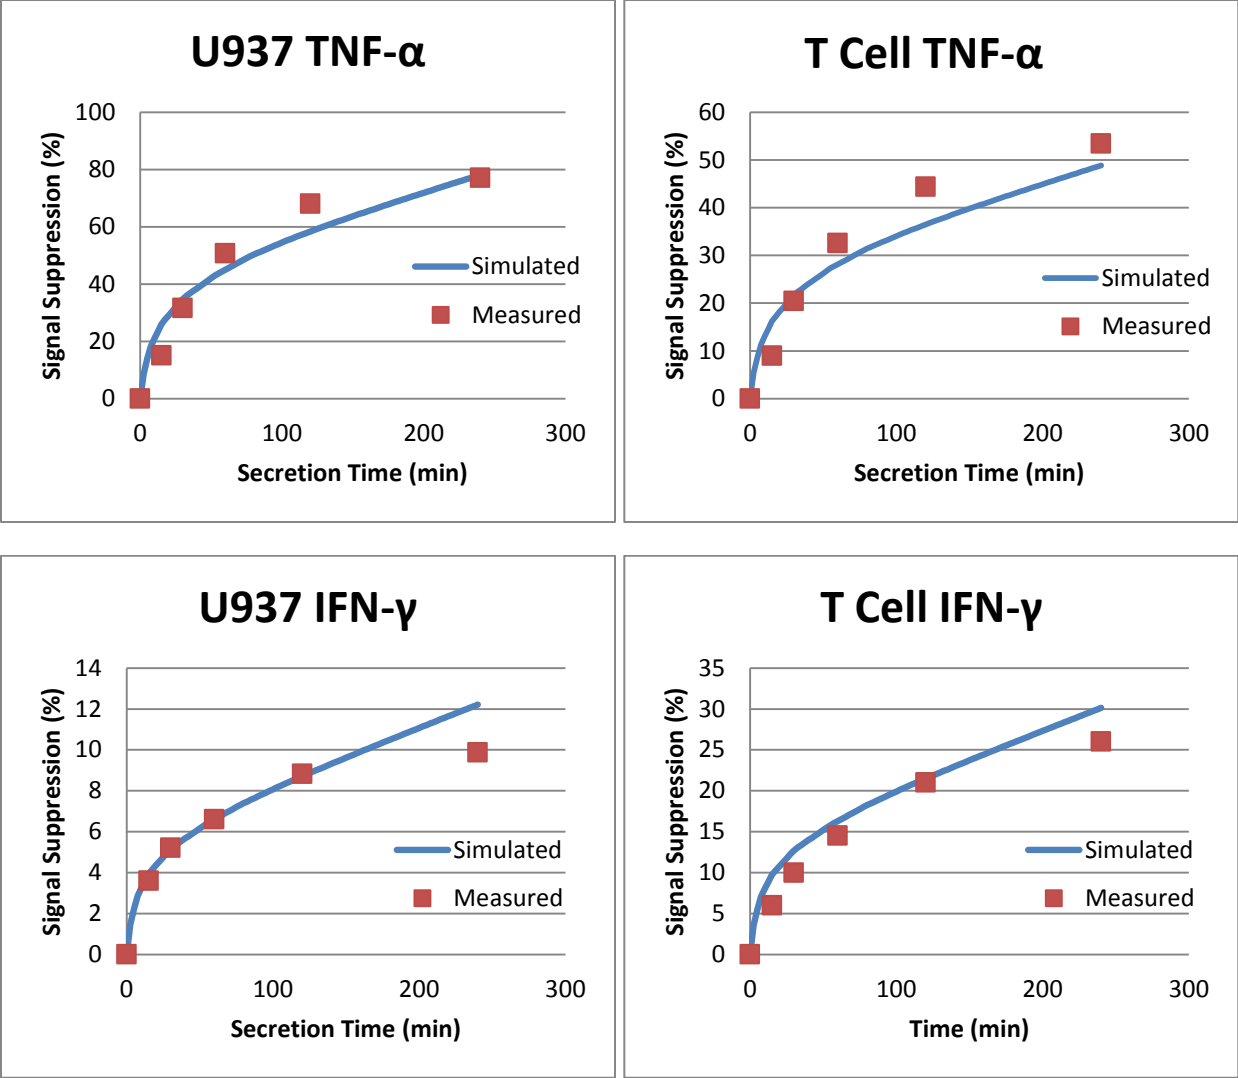

**Figure S3.** Data fitting for determination of IFN- $\gamma$  and TNF- $\alpha$  per cell production rates. Lines represent simulated concentration profiles at the center point of each electrode. Squares represent mean data points averaged over 3 experiments. From this fit we estimate the production rate of TNF- $\alpha$  by activated human monocytes as  $0.0160 \pm 0.0003$  pg/cell/hr and IFN- $\gamma$  is  $0.0030 \pm 0.0001$  pg/cell/hr; for primary T cells, the production rates of IFN- $\gamma$  and TNF- $\alpha$  reported here are  $0.0074 \pm 0.0002$  pg/cell/hr and  $0.0100 \pm 0.001$  pg/cell/hr. Assumption of a constant production rate underestimates short-term and over-estimates the long-term cytokine production.
